# Supplementary material
Source: PubMed Central journal article supplement (PMC10264445)
Supplement: 41467_2023_39147_MOESM1_ESM.pdf [file 41467_2023_39147_MOESM1_ESM.pdf]

**Supplement to**

**Omicron subvariant BA.5 efficiently infects lung cells**

**Markus Hoffmann<sup>1,2,6</sup>, Lok-Yin Roy Wong<sup>3,6</sup>, Prerna Arora<sup>1,2,6</sup>, Lu Zhang<sup>1,2</sup>, Cheila Rocha<sup>1,2</sup>, Abby Odle<sup>3</sup>, Inga Nehlmeier<sup>1</sup>, Amy Kempf<sup>1,2</sup>, Anja Richter<sup>4</sup>, Nico Joel Halwe<sup>5</sup>, Jacob Schön<sup>5</sup>, Lorenz Ulrich<sup>5</sup>, Donata Hoffmann<sup>5</sup>, Martin Beer<sup>5</sup>, Christian Drosten<sup>4</sup>, Stanley Perlman<sup>3</sup>, Stefan Pöhlmann<sup>1,2,7</sup>**

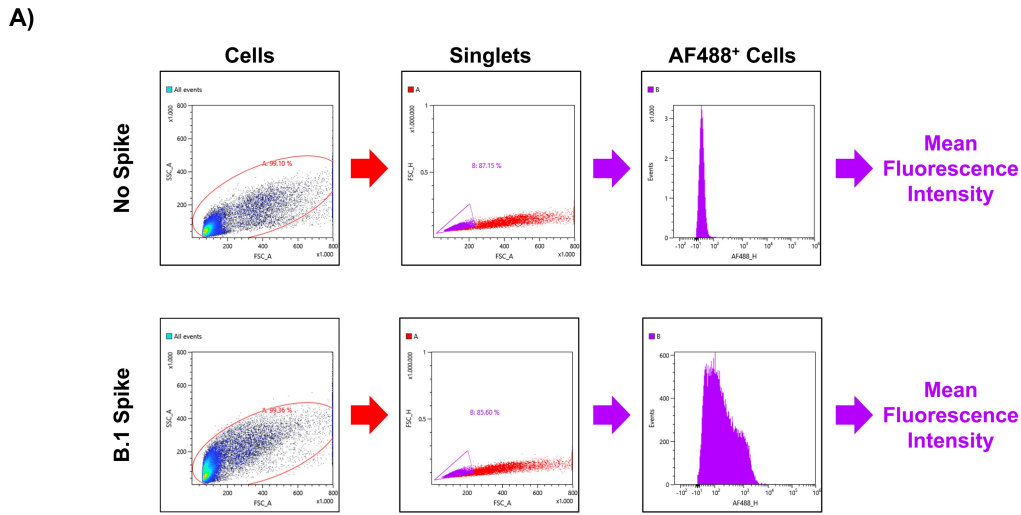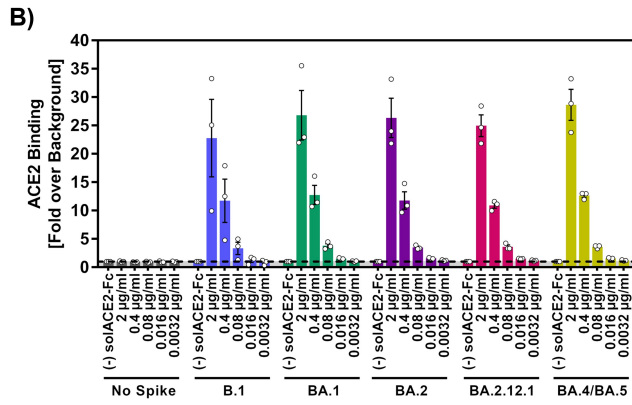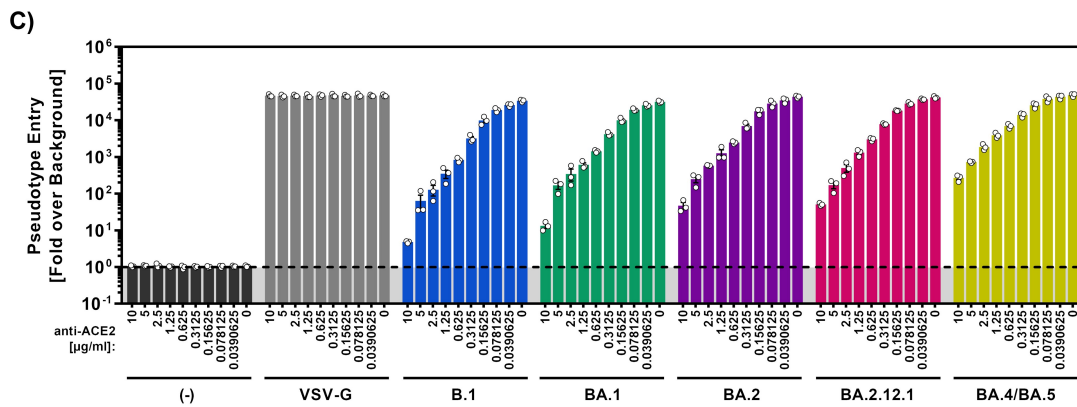

Suppl. Fig. 1 | ACE2 interactions of the S proteins of BA.2.12.1 and BA.4/BA.5 (related to Figure 2).

**a** Gating strategy for flow cytometry (related to Figure 2a). **b** Bar graphs for the data on the efficiency of ACE2 binding by the indicated S proteins (Figure 2a). Individual experiments are indicated by open circles. Average (mean) data  $\pm$  SEM from three biological replicates (each with single samples) are shown. **c** Bar graphs for the data on the inhibition of S protein- or VSV-G-driven cell entry by an ACE2-blocking anti-ACE2 antibody (Figure 2b). Individual experiments are indicated by open circles. Average (mean) data  $\pm$  SEM from three biological replicates (each with four technical replicates) are shown.

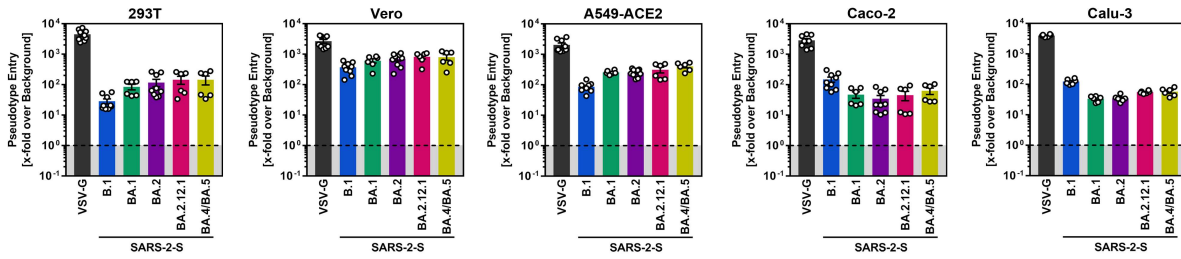

**Suppl. Fig. 2 | Cell entry driven by S proteins of BA.2.12.1 and BA.4/BA.5 (related to Figure 2).**

Pseudotype entry data (Fig. 2c) normalized against the assay background (cells inoculated with pseudoviruses bearing no viral glycoprotein, set as 1). Further, data for pseudoviruses bearing VSV-G are included. The average (mean) data  $\pm$  SEM from six to twelve biological replicates (each with four technical replicates) are presented. Error bars indicate the standard error of the mean.

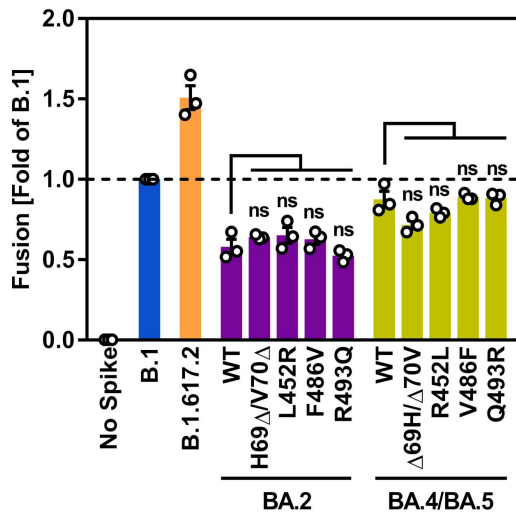

**Suppl. Fig. 3 | Cell-cell fusion driven by mutated BA.2 and BA.5 S proteins (related to Fig. 4).**

293T effector cells transiently coexpressing the indicated S proteins (or no S protein) along with the beta-galactosidase alpha fragment were mixed with 293T target cells transiently coexpressing ACE2 and the beta galactosidase omega fragment. Subsequently, beta-galactosidase substrate was added and luminescence measured. Presented are the average (mean) data of three biological replicates, each performed with four technical replicates. Error bars indicate SEM. Statistical significance was analyzed by two-tailed Student's t-tests with Welch correction ( $p > 0.05$ , not significant [ns];  $p \leq 0.05$ , \*;  $p \leq 0.01$ , \*\*;  $p \leq 0.001$ , \*\*\*), see also Extended Data Table 7.

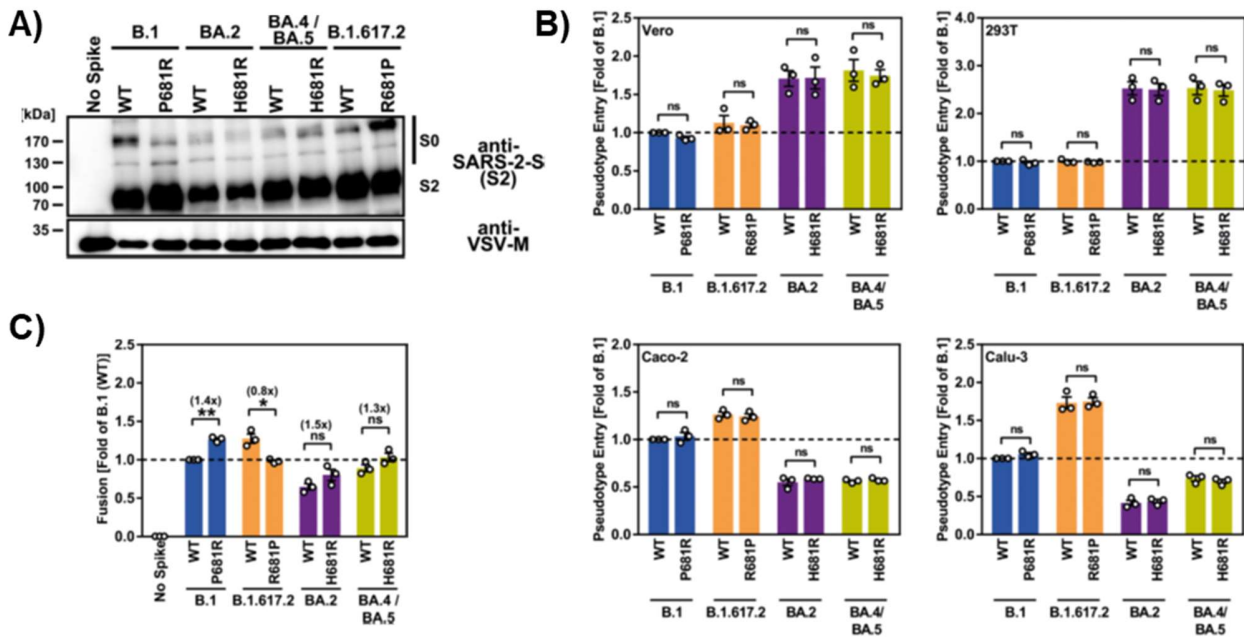

**Suppl. Fig. 4 | Impact of mutation H681R on BA.2 and BA.5 S protein cleavage, cell entry and cell-cell fusion (related to the main text, discussion section).**

**a** Immunoblot analysis of pseudotyped particles harboring the indicated S proteins was used to examine S protein particle incorporation and cleavage. S proteins and VSV-M (loading control) were detected by anti-S2 and anti-VSV-M antibodies in combination with peroxidase-conjugated anti-rabbit (S2) and anti-mouse (VSV-M) secondary antibodies, respectively. The findings of a single experiment are presented and were confirmed in two separate experiments. **b** Cell entry mediated by S proteins. Cell entry was assessed by measuring the activity of virus-encoded firefly luciferase in cell lysates at 16-18 hours after inoculation with particles containing the respective S proteins (or no S protein). The average (mean) data from three biological replicates (each with four technical replicates) are presented, with entry standardized against B.1 (set as 1). The SEM is represented by error bars. Statistical significance was analyzed by two-tailed Student's t-tests with Welch correction ( $p > 0.05$ , not significant [ns];  $p \leq 0.05$ , \*;  $p \leq 0.01$ , \*\*;  $p \leq 0.001$ , \*\*\*). **c** S protein driven cell-cell fusion. 293T effector cells transiently coexpressing the indicated S proteins (or no S protein) along with the beta-galactosidase alpha fragment were mixed with 293T target cells

transiently expressing ACE2 and the beta galactosidase omega fragment. Subsequently, beta-galactosidase substrate was added and luminescence measured. Presented are the average (mean) data of three biological replicates, each performed with four technical replicates. For all panels, error bars indicate SEM and statistical significance was analyzed by two-tailed Student's t-tests with Welch correction ( $p > 0.05$ , not significant [ns];  $p \leq 0.05$ , \*;  $p \leq 0.01$ , \*\*;  $p \leq 0.001$ , \*\*\*), see also Extended Data Table 8.

**A)**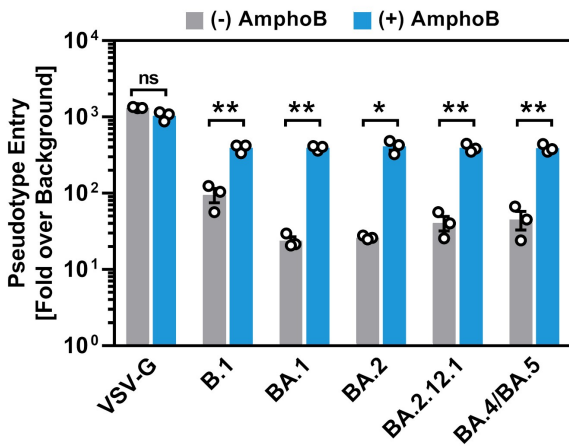**B)**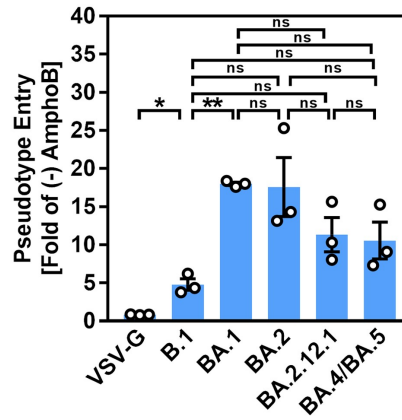

**Suppl. Fig. 5 | Differential augmentation of S protein-driven Calu-3 cell entry by amphotericin B (related to the main text, discussion section).**

**a** Calu-3 cells were preincubated (1h, 37 °C) with amphotericin b (AmphoB, 2.5 μM) before pseudoviruses were added. Pseudovirus cell entry was analyzed at 16-18 hours post inoculation. Presented are the average (mean) data from three biological replicates (each with four technical replicates), for which data were normalized against the assay background (pseudoviruses bearing no viral glycoprotein). **b** The same data were normalized against cells incubated in the absence of AmphoB (set as 1). For all panels, error bars indicate SEM and statistical significance was analyzed by two-tailed Student's t-tests with Welch correction ( $p > 0.05$ , not significant [ns];  $p \leq 0.05$ , \*;  $p \leq 0.01$ , \*\*;  $p \leq 0.001$ , \*\*\*), see also Extended Data Table 9.



**Extended Data Table 1: *P*-values for Figure 1**

| Panel | Experimental Groups | <i>P</i> -value   |        |
|-------|---------------------|-------------------|--------|
| D     | 293T (+ACE2)        | B.1 vs. B.1.617.2 | 0.0238 |
|       |                     | B.1 vs. BA.1      | 0.0016 |
|       |                     | B.1 vs. BA.2      | 0.0151 |
|       |                     | B.1 vs. BA.2.12.1 | 0.0128 |
|       |                     | B.1 vs. BA.4/BA.5 | 0.4898 |
|       | A549-ACE2           | B.1 vs. B.1.617.2 | 0.0070 |
|       |                     | B.1 vs. BA.1      | 0.0047 |
|       |                     | B.1 vs. BA.2      | 0.0095 |
|       |                     | B.1 vs. BA.2.12.1 | 0.0100 |
|       |                     | B.1 vs. BA.4/BA.5 | 0.0414 |

**Extended Data Table 2: *P*-values for Figure 2**

| Panel | Experimental Groups     | <i>P</i> -value    |        |
|-------|-------------------------|--------------------|--------|
| A     | B.1 vs. BA.1            | 0.7122             |        |
|       | B.1 vs. BA.2            | 0.7938             |        |
|       | B.1 vs. BA.2.12.1       | 0.9226             |        |
|       | B.1 vs. BA.4/BA.5       | 0.6114             |        |
|       | BA.4/BA.5 vs. BA.1      | 0.8314             |        |
|       | BA.4/BA.5 vs. BA.2      | 0.6176             |        |
|       | BA.4/BA.5 vs. BA.2.12.1 | 0.1894             |        |
| B     | B.1 vs. BA.1            | 0.0232             |        |
|       | B.1 vs. BA.2            | 0.0201             |        |
|       | B.1 vs. BA.2.12.1       | 0.0081             |        |
|       | B.1 vs. BA.4/BA.5       | 0.0001             |        |
|       | BA.4/BA.5 vs. BA.1      | 0.0004             |        |
|       | BA.4/BA.5 vs. BA.2      | 0.0012             |        |
|       | BA.4/BA.5 vs. BA.2.12.1 | 0.0009             |        |
| G     | 293T                    | B.1 vs. BA.1       | 0.0001 |
|       |                         | B.1 vs. BA.2       | 0.0001 |
|       |                         | B.1 vs. BA.2.12.1  | 0.0058 |
|       |                         | B.1 vs. BA.4/BA.5  | 0.0080 |
|       |                         | BA.1 vs. BA.2      | 0.0300 |
|       |                         | BA.1 vs. BA.2.12.1 | 0.1089 |
|       |                         | BA.1 vs. BA.4/BA.5 | 0.1400 |
|       |                         | BA.2 vs. BA.2.12.1 | 0.8205 |
|       |                         | BA.2 vs. BA.4/BA.5 | 0.8828 |
|       | BA.2.12.1 vs. BA.4/BA.5 | 0.9527             |        |
|       | Vero                    | B.1 vs. BA.1       | 0.0001 |
|       |                         | B.1 vs. BA.2       | 0.0001 |
|       |                         | B.1 vs. BA.2.12.1  | 0.0001 |

|                         |           |                         |        |
|-------------------------|-----------|-------------------------|--------|
|                         |           | B.1 vs. BA.4/BA.5       | 0.0008 |
|                         |           | BA.1 vs. BA.2           | 0.0049 |
|                         |           | BA.1 vs. BA.2.12.1      | 0.0035 |
|                         |           | BA.1 vs. BA.4/BA.5      | 0.0261 |
|                         |           | BA.2 vs. BA.2.12.1      | 0.5843 |
|                         |           | BA.2 vs. BA.4/BA.5      | 0.8563 |
|                         |           | BA.2.12.1 vs. BA.4/BA.5 | 0.7854 |
|                         | A549-ACE2 | B.1 vs. BA.1            | 0.0005 |
|                         |           | B.1 vs. BA.2            | 0.0001 |
|                         |           | B.1 vs. BA.2.12.1       | 0.0021 |
|                         |           | B.1 vs. BA.4/BA.5       | 0.0033 |
|                         |           | BA.1 vs. BA.2           | 0.1839 |
|                         |           | BA.1 vs. BA.2.12.1      | 0.0416 |
|                         |           | BA.1 vs. BA.4/BA.5      | 0.0472 |
|                         |           | BA.2 vs. BA.2.12.1      | 0.1160 |
|                         |           | BA.2 vs. BA.4/BA.5      | 0.1127 |
|                         |           | BA.2.12.1 vs. BA.4/BA.5 | 0.8327 |
|                         | Caco-2    | B.1 vs. BA.1            | 0.0001 |
|                         |           | B.1 vs. BA.2            | 0.0001 |
|                         |           | B.1 vs. BA.2.12.1       | 0.0001 |
|                         |           | B.1 vs. BA.4/BA.5       | 0.0001 |
|                         |           | BA.1 vs. BA.2           | 0.5445 |
|                         |           | BA.1 vs. BA.2.12.1      | 0.8212 |
|                         |           | BA.1 vs. BA.4/BA.5      | 0.1865 |
|                         |           | BA.2 vs. BA.2.12.1      | 0.4806 |
|                         |           | BA.2 vs. BA.4/BA.5      | 0.0690 |
|                         |           | BA.2.12.1 vs. BA.4/BA.5 | 0.3348 |
|                         | Calu-3    | B.1 vs. BA.1            | 0.0001 |
|                         |           | B.1 vs. BA.2            | 0.0001 |
|                         |           | B.1 vs. BA.2.12.1       | 0.0001 |
|                         |           | B.1 vs. BA.4/BA.5       | 0.0001 |
|                         |           | BA.1 vs. BA.2           | 0.6973 |
|                         |           | BA.1 vs. BA.2.12.1      | 0.0018 |
|                         |           | BA.1 vs. BA.4/BA.5      | 0.0006 |
|                         |           | BA.2 vs. BA.2.12.1      | 0.0027 |
|                         |           | BA.2 vs. BA.4/BA.5      | 0.0012 |
| BA.2.12.1 vs. BA.4/BA.5 |           | 0.9071                  |        |

**Extended Data Table 3: *P*-values for Figure 3**

| Panel | Experimental Groups |       | <i>P</i> -value           |        |
|-------|---------------------|-------|---------------------------|--------|
| A     | Vero                | VSV-G | No Inhibitor vs. MDL28170 | 0.1945 |
|       |                     |       | No Inhibitor vs. Camostat | 0.3731 |

|           |                           |               |                                    |        |
|-----------|---------------------------|---------------|------------------------------------|--------|
|           |                           |               | No Inhibitor vs. MDL28170/Camostat | 0.9220 |
|           |                           | B.1           | No Inhibitor vs. MDL28170          | 0.0001 |
|           |                           |               | No Inhibitor vs. Camostat          | 0.2316 |
|           |                           |               | No Inhibitor vs. MDL28170/Camostat | 0.0001 |
|           |                           | BA.1          | No Inhibitor vs. MDL28170          | 0.0001 |
|           |                           |               | No Inhibitor vs. Camostat          | 0.2201 |
|           |                           |               | No Inhibitor vs. MDL28170/Camostat | 0.0001 |
|           |                           | BA.2          | No Inhibitor vs. MDL28170          | 0.0001 |
|           |                           |               | No Inhibitor vs. Camostat          | 0.0075 |
|           |                           |               | No Inhibitor vs. MDL28170/Camostat | 0.0001 |
|           |                           | BA.2.12.1     | No Inhibitor vs. MDL28170          | 0.0001 |
|           |                           |               | No Inhibitor vs. Camostat          | 0.9996 |
|           |                           |               | No Inhibitor vs. MDL28170/Camostat | 0.0001 |
|           |                           | BA.4/BA.5     | No Inhibitor vs. MDL28170          | 0.0001 |
|           |                           |               | No Inhibitor vs. Camostat          | 0.1412 |
|           | Calu-3                    | VSV-G         | No Inhibitor vs. MDL28170          | 0.9975 |
|           |                           |               | No Inhibitor vs. Camostat          | 0.7997 |
|           |                           |               | No Inhibitor vs. MDL28170/Camostat | 0.3448 |
|           |                           | B.1           | No Inhibitor vs. MDL28170          | 0.2304 |
|           |                           |               | No Inhibitor vs. Camostat          | 0.0001 |
|           |                           |               | No Inhibitor vs. MDL28170/Camostat | 0.0001 |
|           |                           | BA.1          | No Inhibitor vs. MDL28170          | 0.0001 |
|           |                           |               | No Inhibitor vs. Camostat          | 0.0271 |
|           |                           |               | No Inhibitor vs. MDL28170/Camostat | 0.0001 |
|           |                           | BA.2          | No Inhibitor vs. MDL28170          | 0.0001 |
|           |                           |               | No Inhibitor vs. Camostat          | 0.0202 |
|           |                           |               | No Inhibitor vs. MDL28170/Camostat | 0.0001 |
|           |                           | BA.2.12.1     | No Inhibitor vs. MDL28170          | 0.0001 |
|           |                           |               | No Inhibitor vs. Camostat          | 0.0207 |
|           |                           |               | No Inhibitor vs. MDL28170/Camostat | 0.0001 |
| BA.4/BA.5 | No Inhibitor vs. MDL28170 | 0.0001        |                                    |        |
|           | No Inhibitor vs. Camostat | 0.0160        |                                    |        |
| B         | Vero /<br>MDL28170        | 0.625 $\mu$ M | B.1 vs. BA.1                       | 0.0001 |
|           |                           |               | B.1 vs. BA.2                       | 0.0001 |
|           |                           |               | B.1 vs. BA.2.12.1                  | 0.0001 |
|           |                           |               | B.1 vs. BA.4/BA.5                  | 0.0001 |
|           |                           | 2.5 $\mu$ M   | B.1 vs. BA.1                       | 0.0001 |
|           |                           |               | B.1 vs. BA.2                       | 0.0001 |
|           | B.1 vs. BA.2.12.1         |               | 0.0001                             |        |
|           | B.1 vs. BA.4/BA.5         |               | 0.0001                             |        |
|           | 10 $\mu$ M                | B.1 vs. BA.1  | 0.0106                             |        |
|           |                           | B.1 vs. BA.2  | 0.0246                             |        |

|                   |                      |                   |                   |        |
|-------------------|----------------------|-------------------|-------------------|--------|
|                   |                      |                   | B.1 vs. BA.2.12.1 | 0.0026 |
|                   |                      |                   | B.1 vs. BA.4/BA.5 | 0.0007 |
|                   |                      | 40 $\mu$ M        | B.1 vs. BA.1      | 0.9999 |
|                   |                      |                   | B.1 vs. BA.2      | 0.9998 |
|                   |                      |                   | B.1 vs. BA.2.12.1 | 0.9997 |
|                   |                      |                   | B.1 vs. BA.4/BA.5 | 0.9997 |
|                   | Calu-3 /<br>MDL28170 | 0.625 $\mu$ M     | B.1 vs. BA.1      | 0.9827 |
|                   |                      |                   | B.1 vs. BA.2      | 0.9997 |
|                   |                      |                   | B.1 vs. BA.2.12.1 | 0.9984 |
|                   |                      |                   | B.1 vs. BA.4/BA.5 | 0.7420 |
|                   |                      | 2.5 $\mu$ M       | B.1 vs. BA.1      | 0.0001 |
|                   |                      |                   | B.1 vs. BA.2      | 0.0001 |
|                   |                      |                   | B.1 vs. BA.2.12.1 | 0.0001 |
|                   |                      |                   | B.1 vs. BA.4/BA.5 | 0.0001 |
|                   |                      | 10 $\mu$ M        | B.1 vs. BA.1      | 0.0001 |
|                   |                      |                   | B.1 vs. BA.2      | 0.0001 |
|                   |                      |                   | B.1 vs. BA.2.12.1 | 0.0001 |
|                   |                      |                   | B.1 vs. BA.4/BA.5 | 0.0001 |
|                   | 40 $\mu$ M           | B.1 vs. BA.1      | 0.0001            |        |
|                   |                      | B.1 vs. BA.2      | 0.0001            |        |
|                   |                      | B.1 vs. BA.2.12.1 | 0.0001            |        |
|                   |                      | B.1 vs. BA.4/BA.5 | 0.0001            |        |
|                   | Caco-2 /<br>Camostat | 0.08 $\mu$ M      | B.1 vs. BA.1      | 0.9885 |
|                   |                      |                   | B.1 vs. BA.2      | 0.9971 |
|                   |                      |                   | B.1 vs. BA.2.12.1 | 0.9902 |
|                   |                      |                   | B.1 vs. BA.4/BA.5 | 0.8688 |
|                   |                      | 0.4 $\mu$ M       | B.1 vs. BA.1      | 0.5912 |
|                   |                      |                   | B.1 vs. BA.2      | 0.7783 |
| B.1 vs. BA.2.12.1 |                      |                   | 0.9873            |        |
| B.1 vs. BA.4/BA.5 |                      |                   | 0.9059            |        |
| 2 $\mu$ M         |                      | B.1 vs. BA.1      | 0.0439            |        |
|                   |                      | B.1 vs. BA.2      | 0.0454            |        |
|                   |                      | B.1 vs. BA.2.12.1 | 0.2729            |        |
|                   |                      | B.1 vs. BA.4/BA.5 | 0.1389            |        |
| 10 $\mu$ M        |                      | B.1 vs. BA.1      | 0.0003            |        |
|                   |                      | B.1 vs. BA.2      | 0.0008            |        |
|                   |                      | B.1 vs. BA.2.12.1 | 0.0004            |        |
|                   |                      | B.1 vs. BA.4/BA.5 | 0.0005            |        |
| 50 $\mu$ M        |                      | B.1 vs. BA.1      | 0.0001            |        |
|                   |                      | B.1 vs. BA.2      | 0.0001            |        |
|                   |                      | B.1 vs. BA.2.12.1 | 0.0001            |        |
|                   |                      | B.1 vs. BA.4/BA.5 | 0.0001            |        |

|                   |                   |                   |        |
|-------------------|-------------------|-------------------|--------|
| Calu-3 / Camostat | 0.08 $\mu$ M      | B.1 vs. BA.1      | 0.0029 |
|                   |                   | B.1 vs. BA.2      | 0.0009 |
|                   |                   | B.1 vs. BA.2.12.1 | 0.0030 |
|                   |                   | B.1 vs. BA.4/BA.5 | 0.0054 |
|                   | 0.4 $\mu$ M       | B.1 vs. BA.1      | 0.0001 |
|                   |                   | B.1 vs. BA.2      | 0.0001 |
|                   |                   | B.1 vs. BA.2.12.1 | 0.0001 |
|                   |                   | B.1 vs. BA.4/BA.5 | 0.0001 |
|                   | 2 $\mu$ M         | B.1 vs. BA.1      | 0.0001 |
|                   |                   | B.1 vs. BA.2      | 0.0001 |
|                   |                   | B.1 vs. BA.2.12.1 | 0.0001 |
|                   |                   | B.1 vs. BA.4/BA.5 | 0.0001 |
|                   | 10 $\mu$ M        | B.1 vs. BA.1      | 0.0001 |
|                   |                   | B.1 vs. BA.2      | 0.0001 |
|                   |                   | B.1 vs. BA.2.12.1 | 0.0001 |
|                   |                   | B.1 vs. BA.4/BA.5 | 0.0001 |
| 50 $\mu$ M        | B.1 vs. BA.1      | 0.0001            |        |
|                   | B.1 vs. BA.2      | 0.0001            |        |
|                   | B.1 vs. BA.2.12.1 | 0.0001            |        |
|                   | B.1 vs. BA.4/BA.5 | 0.0001            |        |

**Extended Data Table 4: *P*-values for Figure 4**

| Panel | Experimental Groups |                                   | <i>P</i> -value                   |        |
|-------|---------------------|-----------------------------------|-----------------------------------|--------|
| A     | Vero                | BA.2                              | WT vs. H69 $\Delta$ /V70 $\Delta$ | 0.4621 |
|       |                     |                                   | WT vs. L452R                      | 0.2900 |
|       |                     |                                   | WT vs. F486V                      | 0.3366 |
|       |                     |                                   | WT vs. R493Q                      | 0.4019 |
|       | BA.4/BA.5           | WT vs. $\Delta$ 69H/ $\Delta$ 70V | 0.1747                            |        |
|       |                     | WT vs. R452L                      | 0.1589                            |        |
|       |                     | WT vs. V486F                      | 0.2680                            |        |
|       |                     | WT vs. Q493R                      | 0.0939                            |        |
| B     | Calu-3              | BA.2                              | WT vs. H69 $\Delta$ /V70 $\Delta$ | 0.0203 |
|       |                     |                                   | WT vs. L452R                      | 0.6740 |
|       |                     |                                   | WT vs. F486V                      | 0.9652 |
|       |                     |                                   | WT vs. R493Q                      | 0.4780 |
|       | BA.4/BA.5           | WT vs. $\Delta$ 69H/ $\Delta$ 70V | 0.0198                            |        |
|       |                     | WT vs. R452L                      | 0.0353                            |        |
|       |                     | WT vs. V486F                      | 0.9213                            |        |
|       |                     | WT vs. Q493R                      | 0.0002                            |        |

**Extended Data Table 5: *P*-values for Figure 5**

| Panel | Experimental Groups |              | <i>P</i> -value |
|-------|---------------------|--------------|-----------------|
| A     | Vero                | B.1 vs. BA.1 | 0.0654          |

|   |        |               |        |
|---|--------|---------------|--------|
|   |        | B.1 vs. BA.2  | 0.7647 |
|   |        | B.1 vs. BA.4  | 0.0319 |
|   |        | B.1 vs. BA.5  | 0.0727 |
|   |        | BA.1 vs. BA.2 | 0.0769 |
|   |        | BA.1 vs. BA.4 | 0.0169 |
|   |        | BA.1 vs. BA.5 | 0.0025 |
|   |        | BA.2 vs. BA.4 | 0.0347 |
|   |        | BA.2 vs. BA.5 | 0.0462 |
|   |        | BA.4 vs. BA.5 | 0.0012 |
| B | Calu-3 | B.1 vs. BA.1  | 0.0004 |
|   |        | B.1 vs. BA.2  | 0.0011 |
|   |        | B.1 vs. BA.4  | 0.0011 |
|   |        | B.1 vs. BA.5  | 0.0007 |
|   |        | BA.1 vs. BA.2 | 0.3240 |
|   |        | BA.1 vs. BA.4 | 0.2211 |
|   |        | BA.1 vs. BA.5 | 0.0002 |
|   |        | BA.2 vs. BA.4 | 0.1392 |
|   |        | BA.2 vs. BA.5 | 0.0015 |
|   |        | BA.4 vs. BA.5 | 0.0014 |

**Extended Data Table 6: *P*-values for Figure 6**

| Panel | Experimental Groups |               | <i>P</i> -value |        |
|-------|---------------------|---------------|-----------------|--------|
| C     | Day 2               | BA.1 vs. BA.4 | 0.0001          |        |
|       |                     | BA.1 vs. BA.5 | 0.0035          |        |
|       |                     | BA.4 vs. BA.5 | 0.0043          |        |
| D     | SARS-2-N            | Day 2         | BA.1 vs. BA.4   | 0.0214 |
|       |                     |               | BA.1 vs. BA.5   | 0.0327 |
|       |                     |               | BA.4 vs. BA.5   | 0.0207 |
|       | Day 5               | BA.1 vs. BA.4 | 0.3348          |        |
|       |                     | BA.1 vs. BA.5 | 0.3102          |        |
|       |                     | BA.4 vs. BA.5 | 0.0002          |        |
| E     | IFN-alpha           | Day 2         | BA.1 vs. BA.4   | 0.3830 |
|       |                     |               | BA.1 vs. BA.5   | 0.0026 |
|       |                     |               | BA.4 vs. BA.5   | 0.0149 |
|       |                     | Day 5         | BA.1 vs. BA.4   | 0.8397 |
|       |                     |               | BA.1 vs. BA.5   | 0.5202 |
|       |                     |               | BA.4 vs. BA.5   | 0.0964 |
|       | IFN-beta            | Day 2         | BA.1 vs. BA.4   | 0.0068 |
|       |                     |               | BA.1 vs. BA.5   | 0.1217 |
|       |                     |               | BA.4 vs. BA.5   | 0.0369 |
|       |                     | Day 5         | BA.1 vs. BA.4   | 0.4131 |
|       |                     | BA.1 vs. BA.5 | 0.3364          |        |

|  |            |       |               |        |
|--|------------|-------|---------------|--------|
|  |            |       | BA.4 vs. BA.5 | 0.0089 |
|  | IFN-gamma  | Day 2 | BA.1 vs. BA.4 | 0.0343 |
|  |            |       | BA.1 vs. BA.5 | 0.0251 |
|  |            |       | BA.4 vs. BA.5 | 0.1642 |
|  |            | Day 5 | BA.1 vs. BA.4 | 0.9961 |
|  |            |       | BA.1 vs. BA.5 | 0.4284 |
|  |            |       | BA.4 vs. BA.5 | 0.4368 |
|  | IFN-lambda | Day 2 | BA.1 vs. BA.4 | 0.0032 |
|  |            |       | BA.1 vs. BA.5 | 0.0009 |
|  |            |       | BA.4 vs. BA.5 | 0.0008 |
|  |            | Day 5 | BA.1 vs. BA.4 | 0.7408 |
|  |            |       | BA.1 vs. BA.5 | 0.4895 |
|  |            |       | BA.4 vs. BA.5 | 0.3927 |
|  | ISG15      | Day 2 | BA.1 vs. BA.4 | 0.0032 |
|  |            |       | BA.1 vs. BA.5 | 0.0170 |
|  |            |       | BA.4 vs. BA.5 | 0.2001 |
|  |            | Day 5 | BA.1 vs. BA.4 | 0.0197 |
|  |            |       | BA.1 vs. BA.5 | 0.8768 |
|  |            |       | BA.4 vs. BA.5 | 0.0236 |
|  | CCL2       | Day 2 | BA.1 vs. BA.4 | 0.0090 |
|  |            |       | BA.1 vs. BA.5 | 0.0387 |
|  |            |       | BA.4 vs. BA.5 | 0.0569 |
|  |            | Day 5 | BA.1 vs. BA.4 | 0.6089 |
|  |            |       | BA.1 vs. BA.5 | 0.6677 |
|  |            |       | BA.4 vs. BA.5 | 0.0059 |
|  | CCL5       | Day 2 | BA.1 vs. BA.4 | 0.0461 |
|  |            |       | BA.1 vs. BA.5 | 0.1270 |
|  |            |       | BA.4 vs. BA.5 | 0.9831 |
|  |            | Day 5 | BA.1 vs. BA.4 | 0.4156 |
|  |            |       | BA.1 vs. BA.5 | 0.4327 |
|  |            |       | BA.4 vs. BA.5 | 0.6595 |
|  | TNF-alpha  | Day 2 | BA.1 vs. BA.4 | 0.0297 |
|  |            |       | BA.1 vs. BA.5 | 0.0006 |
|  |            |       | BA.4 vs. BA.5 | 0.0099 |
|  |            | Day 5 | BA.1 vs. BA.4 | 0.2885 |
|  |            |       | BA.1 vs. BA.5 | 0.7558 |
|  |            |       | BA.4 vs. BA.5 | 0.0308 |
|  | IL6        | Day 2 | BA.1 vs. BA.4 | 0.0058 |
|  |            |       | BA.1 vs. BA.5 | 0.0165 |
|  |            |       | BA.4 vs. BA.5 | 0.0210 |
|  |            | Day 5 | BA.1 vs. BA.4 | 0.3559 |
|  |            |       | BA.1 vs. BA.5 | 0.3559 |

|  |        |       |               |        |
|--|--------|-------|---------------|--------|
|  | CXCL10 | Day 2 | BA.4 vs. BA.5 | 0.7358 |
|  |        |       | BA.1 vs. BA.4 | 0.0029 |
|  |        |       | BA.1 vs. BA.5 | 0.0116 |
|  |        |       | BA.4 vs. BA.5 | 0.0113 |
|  |        | Day 5 | BA.1 vs. BA.4 | 0.0033 |
|  |        |       | BA.1 vs. BA.5 | 0.0005 |
|  |        |       | BA.4 vs. BA.5 | 0.0011 |

**Extended Data Table 7: *P*-values for Extended Data Figure 3**

| Panel | Experimental Groups | <i>P</i> -value   |        |
|-------|---------------------|-------------------|--------|
| n/a   | BA.2                | WT vs. H69Δ/V70Δ  | 0.3271 |
|       |                     | WT vs. L452R      | 0.3554 |
|       |                     | WT vs. F486V      | 0.4593 |
|       |                     | WT vs. R493Q      | 0.3637 |
|       | BA.4/BA.5           | WT vs. Δ69H/ Δ70V | 0.0651 |
|       |                     | WT vs. R452L      | 0.2270 |
|       |                     | WT vs. V486F      | 0.7888 |
|       |                     | WT vs. Q493R      | 0.8945 |

**Extended Data Table 8: *P*-values for Extended Data Figure 4**

| Panel | Experimental Groups     | <i>P</i> -value         |        |
|-------|-------------------------|-------------------------|--------|
| B     | Vero                    | B.1: WT vs. P681R       | 0.0853 |
|       |                         | B.1.617.2: WT vs. R681P | 0.7913 |
|       |                         | BA.2 WT vs. H681R       | 0.9665 |
|       |                         | BA.4/BA.5: WT vs. H681R | 0.7016 |
|       | 293T                    | B.1: WT vs. P681R       | 0.4852 |
|       |                         | B.1.617.2: WT vs. R681P | 0.4796 |
|       |                         | BA.2 WT vs. H681R       | 0.9030 |
|       |                         | BA.4/BA.5: WT vs. H681R | 0.8143 |
|       | Caco-2                  | B.1: WT vs. P681R       | 0.4937 |
|       |                         | B.1.617.2: WT vs. R681P | 0.6298 |
|       |                         | BA.2 WT vs. H681R       | 0.4162 |
|       |                         | BA.4/BA.5: WT vs. H681R | 0.4610 |
|       | Calu-3                  | B.1: WT vs. P681R       | 0.1278 |
|       |                         | B.1.617.2: WT vs. R681P | 0.8704 |
|       |                         | BA.2 WT vs. H681R       | 0.6762 |
|       |                         | BA.4/BA.5: WT vs. H681R | 0.4402 |
| C     | B.1: WT vs. P681R       |                         | 0.0055 |
|       | B.1.617.2: WT vs. R681P |                         | 0.0333 |
|       | BA.2 WT vs. H681R       |                         | 0.1555 |
|       | BA.4/BA.5: WT vs. H681R |                         | 0.1185 |

**Extended Data Table 9: *P*-values for Extended Data Figure 5**



| Panel | Experimental Groups                | P-value |
|-------|------------------------------------|---------|
| A     | VSV-G: (-)AmphoB vs. (+)AmphoB     | 0.0684  |
|       | B.1: (-)AmphoB vs. (+)AmphoB       | 0.0016  |
|       | BA.1: (-)AmphoB vs. (+)AmphoB      | 0.0014  |
|       | BA.2: (-)AmphoB vs. (+)AmphoB      | 0.0142  |
|       | BA.2.12.1: (-)AmphoB vs. (+)AmphoB | 0.0032  |
|       | BA.4/BA.5: (-)AmphoB vs. (+)AmphoB | 0.0018  |
| B     | VSV-G vs. B.1                      | 0.0330  |
|       | B.1 vs. BA.1                       | 0.0015  |
|       | B.1 vs. BA.2                       | 0.0761  |
|       | B.1 vs. BA.2.12.1                  | 0.0895  |
|       | B.1 vs. BA.4/BA.5                  | 0.1289  |
|       | BA.1 vs. BA.2                      | 0.9242  |
|       | BA.1 vs. BA.2.12.1                 | 0.0967  |
|       | BA.1 vs. BA.4/BA.5                 | 0.0894  |
|       | BA.2 vs. BA.2.12.1                 | 0.2522  |
|       | BA.2 vs. BA.4/BA.5                 | 0.2123  |
|       | BA.2.12.1 vs. BA.4/BA.5            | 0.8262  |

**Extended Data Table 10: Primer used in this study**

| Name                 | Sequence                                  |
|----------------------|-------------------------------------------|
| pCG1 Seq F           | CCTGGGCAACGTGCTGGT                        |
| pCG1 Seq R           | GTCAGATGCTCAAGGGGCTTCA                    |
| SARS-2-S (BamHI) F   | AAGGCCGGATCCGCCACCATGTTCGTGTTTCTGGTGCTGC  |
| SARS-2-SΔ18 (XbaI) R | AAGGCCTCTAGACTACTTGCAGCAGCTGCCACAGC       |
| SARS-2-S Seq-1       | CAAGATCTACAGCAAGCACACC                    |
| SARS-2-S Seq-2       | GTCGGCGGCAACTACAATTAC                     |
| SARS-2-S Seq-3       | GGCTGTCTGATCGGAGCCGAG                     |
| SARS-2-S Seq-4       | TGAGATGATCGCCAGTACAC                      |
| SARS-2-S Seq-5       | GCCATCTGCCACGACGGCAAAG                    |
| BA.2 (H69Δ/V70Δ) F   | CCTGGTTCCACGCCATCTCCGGCACCAATGGCACC       |
| BA.2 (H69Δ/V70Δ) R   | GGTGCCATTGGTGCCGGAGATGGCGTGGAACCAGG       |
| BA.2 (L452R) F       | CGGCAACTACAATTACCGGTACCGGCTGTTCCGG        |
| BA.2 (L452R) R       | CCGGAACAGCCGGTACCGGTAATTGTAGTTGCCG        |
| BA.2 (F486V) F       | GTAACGGCGTGGCAGGCGTCAACTGCTACTTCCCAC      |
| BA.2 (F486V) R       | GTGGGAAGTAGCAGTTGACGCCTGCCACGCCGTTAC      |
| BA.2 (R495Q) F       | CTGCTACTTCCCCTGCAGTCTACGGCTTTCGG          |
| BA.2 (R495Q) R       | CCGAAAGCCGTAGGACTGCAGTGGGAAGTAGCAG        |
| BA.4/5 (Δ69H/Δ70V) F | CCTGGTTCCACGCCATCCACGTGTCCGGCACCAATGGCACC |
| BA.4/5 (Δ69H/Δ70V) R | GGTGCCATTGGTGCCGGACACGTGGATGGCGTGGAACCAGG |
| BA.4/5 (R452L) F     | CGGCAACTACAATTACCTGTACCGGCTGTTCCGG        |
| BA.4/5 (R452L) R     | CCGGAACAGCCGGTACAGGTAATTGTAGTTGCCG        |
| BA.4/5 (V486F) F     | GTAACGGCGTGGCAGGCTTCAACTGCTACTTCCCAC      |
| BA.4/5 (V486F) R     | GTGGGAAGTAGCAGTTGAAGCCTGCCACGCCGTTAC      |

|                       |                                     |
|-----------------------|-------------------------------------|
| BA.4/5 (Q493R) F      | GCTACTTCCCCTGCGGTCCTACGGCTTTCGG     |
| BA.4/5 (Q493R) R      | CCGAAAGCCGTAGGACCGCAGTGGGAAGTAGC    |
| B.1 (P681R) F         | GACACAGACAAACAGCCGCAGACGGGCCAGATCTG |
| B.1 (P681R) R         | CAGATCTGGCCCGTCTGCGGCTGTTTGTCTGTGTC |
| B.1.617.2 (R681P) F   | GACACAGACAAACAGCCCCAGACGGGCCAGATCTG |
| B.1.617.2 (R681P) R   | CAGATCTGGCCCGTCTGGGGCTGTTTGTCTGTGTC |
| BA.2+BA.4/5 (H681R) F | GACACAGACAAAGAGCCGCAGACGGGCCAGATCTG |
| BA.2+BA.4/5 (H681R) R | CAGATCTGGCCCGTCTGCGGCTCTTTGTCTGTGTC |
|                       |                                     |
