# Supplementary material
Source: PubMed Central journal article supplement (PMC10264445)
Supplement: 41467_2023_39147_MOESM2_ESM.pdf [file 41467_2023_39147_MOESM2_ESM.pdf]

## Reporting Summary

Nature Portfolio wishes to improve the reproducibility of the work that we publish. This form provides structure for consistency and transparency in reporting. For further information on Nature Portfolio policies, see our [Editorial Policies](#) and the [Editorial Policy Checklist](#).

### Statistics

For all statistical analyses, confirm that the following items are present in the figure legend, table legend, main text, or Methods section.

- | n/a                                 | Confirmed                                                                                                                                                                                                                                                                                      |
|-------------------------------------|------------------------------------------------------------------------------------------------------------------------------------------------------------------------------------------------------------------------------------------------------------------------------------------------|
| <input type="checkbox"/>            | <input checked="" type="checkbox"/> The exact sample size ( $n$ ) for each experimental group/condition, given as a discrete number and unit of measurement                                                                                                                                    |
| <input type="checkbox"/>            | <input checked="" type="checkbox"/> A statement on whether measurements were taken from distinct samples or whether the same sample was measured repeatedly                                                                                                                                    |
| <input type="checkbox"/>            | <input checked="" type="checkbox"/> The statistical test(s) used AND whether they are one- or two-sided<br><i>Only common tests should be described solely by name; describe more complex techniques in the Methods section.</i>                                                               |
| <input type="checkbox"/>            | <input checked="" type="checkbox"/> A description of all covariates tested                                                                                                                                                                                                                     |
| <input type="checkbox"/>            | <input checked="" type="checkbox"/> A description of any assumptions or corrections, such as tests of normality and adjustment for multiple comparisons                                                                                                                                        |
| <input type="checkbox"/>            | <input checked="" type="checkbox"/> A full description of the statistical parameters including central tendency (e.g. means) or other basic estimates (e.g. regression coefficient) AND variation (e.g. standard deviation) or associated estimates of uncertainty (e.g. confidence intervals) |
| <input type="checkbox"/>            | <input checked="" type="checkbox"/> For null hypothesis testing, the test statistic (e.g. $F$ , $t$ , $r$ ) with confidence intervals, effect sizes, degrees of freedom and $P$ value noted<br><i>Give <math>P</math> values as exact values whenever suitable.</i>                            |
| <input checked="" type="checkbox"/> | <input type="checkbox"/> For Bayesian analysis, information on the choice of priors and Markov chain Monte Carlo settings                                                                                                                                                                      |
| <input checked="" type="checkbox"/> | <input type="checkbox"/> For hierarchical and complex designs, identification of the appropriate level for tests and full reporting of outcomes                                                                                                                                                |
| <input checked="" type="checkbox"/> | <input type="checkbox"/> Estimates of effect sizes (e.g. Cohen's $d$ , Pearson's $r$ ), indicating how they were calculated                                                                                                                                                                    |

*Our web collection on [statistics for biologists](#) contains articles on many of the points above.*

### Software and code

Policy information about [availability of computer code](#)

|                 |                                                                                                                                                                                                                                                                                                                                                                                                           |
|-----------------|-----------------------------------------------------------------------------------------------------------------------------------------------------------------------------------------------------------------------------------------------------------------------------------------------------------------------------------------------------------------------------------------------------------|
| Data collection | Hidex Sense Microplate Reader Software (version 0.5.41.0), Hidex Deutschland Vertrieb GmbH, <a href="https://www.hidex.de/">https://www.hidex.de/</a> ; ID7000 Spectral Cell Analyzer software (version 1.1.8.18211, Sony Biotechnology, San Jose, CA, USA); ChemoStar Professional software (version v.0.3.23, Intas Science Imaging Instruments)                                                        |
| Data analysis   | ID7000 Spectral Cell Analyzer software (version 1.1.8.18211, Sony Biotechnology, San Jose, CA, USA); ImageJ software (version 1.53C, <a href="https://imagej.nih.gov/ij/">https://imagej.nih.gov/ij/</a> ); Microsoft Excel (as part of the Microsoft Office software package, version 2019, Microsoft Corporation) and GraphPad Prism 8 version 8.4.3 (GraphPad Software) were used to analyze the data. |

For manuscripts utilizing custom algorithms or software that are central to the research but not yet described in published literature, software must be made available to editors and reviewers. We strongly encourage code deposition in a community repository (e.g. GitHub). See the Nature Portfolio [guidelines for submitting code & software](#) for further information.

## Data

Policy information about [availability of data](#)

All manuscripts must include a [data availability statement](#). This statement should provide the following information, where applicable:

- Accession codes, unique identifiers, or web links for publicly available datasets
- A description of any restrictions on data availability
- For clinical datasets or third party data, please ensure that the statement adheres to our [policy](#)

The sequences of SARS-CoV-2 spike proteins were obtained from GISAID database (<https://gisaid.org/>). All unprocessed data generated in this study are provided in the Supplementary Information. Any additional information required to reanalyze the data reported in this paper is available on reasonable request.

## Human research participants

Policy information about [studies involving human research participants and Sex and Gender in Research](#).

|                             |                                  |
|-----------------------------|----------------------------------|
| Reporting on sex and gender | <input type="text" value="n/a"/> |
| Population characteristics  | <input type="text" value="n/a"/> |
| Recruitment                 | <input type="text" value="n/a"/> |
| Ethics oversight            | <input type="text" value="n/a"/> |

Note that full information on the approval of the study protocol must also be provided in the manuscript.

## Field-specific reporting

Please select the one below that is the best fit for your research. If you are not sure, read the appropriate sections before making your selection.

- Life sciences       Behavioural & social sciences       Ecological, evolutionary & environmental sciences

For a reference copy of the document with all sections, see [nature.com/documents/nr-reporting-summary-flat.pdf](https://www.nature.com/documents/nr-reporting-summary-flat.pdf)

## Life sciences study design

All studies must disclose on these points even when the disclosure is negative.

|                 |                                                                                                                                                                                                                                                                                                                                                                                     |
|-----------------|-------------------------------------------------------------------------------------------------------------------------------------------------------------------------------------------------------------------------------------------------------------------------------------------------------------------------------------------------------------------------------------|
| Sample size     | Sample size for cell culture and animal studies was chosen to allow for statistical significance, based on previous data (Hoffmann et al, Cell, 2020, PMID: 32142651; Halfmann et al, Nature, 2022, PMID: 35062015; Barut et al, Nat Commun, 2022; PMID: 36207334). For animal welfare reasons and in accordance with the pilot study character, we only used small animal numbers. |
| Data exclusions | No data were excluded from the analysis.                                                                                                                                                                                                                                                                                                                                            |
| Replication     | All in vitro findings were confirmed in at least three independent experiments. All results could be reproduced. In vivo findings were obtained from three to five biological replicates, which yielded comparable results and were analyzed within one experiment.                                                                                                                 |
| Randomization   | Randomization of cell culture studies was not done and was not applicable. Mice and ferrets were randomly assigned to groups.                                                                                                                                                                                                                                                       |
| Blinding        | Since all of the mouse and ferret studies were performed in the BSL3 laboratory, blinding was not possible because of biosafety considerations.                                                                                                                                                                                                                                     |

## Reporting for specific materials, systems and methods

We require information from authors about some types of materials, experimental systems and methods used in many studies. Here, indicate whether each material, system or method listed is relevant to your study. If you are not sure if a list item applies to your research, read the appropriate section before selecting a response.

## Materials &amp; experimental systems

| n/a                                 | Involvement                                                     |
|-------------------------------------|-----------------------------------------------------------------|
| <input type="checkbox"/>            | <input checked="" type="checkbox"/> Antibodies                  |
| <input type="checkbox"/>            | <input checked="" type="checkbox"/> Eukaryotic cell lines       |
| <input checked="" type="checkbox"/> | <input type="checkbox"/> Palaeontology and archaeology          |
| <input type="checkbox"/>            | <input checked="" type="checkbox"/> Animals and other organisms |
| <input checked="" type="checkbox"/> | <input type="checkbox"/> Clinical data                          |
| <input checked="" type="checkbox"/> | <input type="checkbox"/> Dual use research of concern           |

## Methods

| n/a                                 | Involvement                                        |
|-------------------------------------|----------------------------------------------------|
| <input checked="" type="checkbox"/> | <input type="checkbox"/> ChIP-seq                  |
| <input type="checkbox"/>            | <input checked="" type="checkbox"/> Flow cytometry |
| <input checked="" type="checkbox"/> | <input type="checkbox"/> MRI-based neuroimaging    |

## Antibodies

|                 |                                                                                                                                                                                                                                                                                                                                                                                                                                                                                                                                                                                                                                                                                                                                                                                                                                                    |
|-----------------|----------------------------------------------------------------------------------------------------------------------------------------------------------------------------------------------------------------------------------------------------------------------------------------------------------------------------------------------------------------------------------------------------------------------------------------------------------------------------------------------------------------------------------------------------------------------------------------------------------------------------------------------------------------------------------------------------------------------------------------------------------------------------------------------------------------------------------------------------|
| Antibodies used | <p>goat anti-Human IgG (H+L) cross-adsorbed secondary antibody AlexaFlour-488-conjugated antibody (Thermo Fisher Scientific, Catalog # A-11013).</p> <p>anti-SARS-CoV-2 (2019-nCoV) Spike S2 Antibody, Rabbit PAb, antigen affinity purified (Biozol, Cat: SIN-40590-T62))</p> <p>anti-VSV-M [23H12] antibody (Kerafast, Cat: EB0011)</p> <p>anti-rabbit antibody (goat IgG anti-rabbit IgG (H+L)-HRPO (Dianova, Cat: 111-035-003)) coupled with horseradish peroxidase</p> <p>anti-mouse antibody (goat IgG anti-mouse IgG (H+L)-HRPO (Dianova, Cat: 115-035-003)) coupled with horseradish peroxidase</p> <p>anti-VSV-G antibody (culture supernatant from I1-hybridoma cells; ATCC no. CRL-2700)</p> <p>anti-ACE2 antibody (Sino Biological, Cat: 10108-MM36)</p> <p>anti-ferret IgG FITC-conjugated secondary antibody (Bethyl, A140-108F)</p> |
| Validation      | <p>The primary antibodies were validated in the following studies:</p> <p>Arora et al, Int J Mol Sci. 2022, PMID: 36430535 (anti-SARS-CoV-2 (2019-nCoV), Spike S2 antibody and anti-VSV-M antibody validated for immunoblot)</p> <p>Lefrancios and Lyles, Virology 1982, PMID: 6180550 (anti-VSV-G antibody validated for neutralization of VSV-G-driven cell entry)</p> <p>Hoffmann et al, mBio, 2022, PMID: 35467423 (anti-ACE2 antibody validated for inhibition of SARS-CoV-2 spike protein driven entry)</p>                                                                                                                                                                                                                                                                                                                                  |

## Eukaryotic cell lines

Policy information about [cell lines and Sex and Gender in Research](#)

|                                                                   |                                                                                                                                                                                                                                                                                                                                                                                                                                                                                                                                                                                                                                                                                                                                      |
|-------------------------------------------------------------------|--------------------------------------------------------------------------------------------------------------------------------------------------------------------------------------------------------------------------------------------------------------------------------------------------------------------------------------------------------------------------------------------------------------------------------------------------------------------------------------------------------------------------------------------------------------------------------------------------------------------------------------------------------------------------------------------------------------------------------------|
| Cell line source(s)                                               | <p>293T (human, female, kidney; ACC-635, DSMZ; RRID: CVCL_0063)</p> <p>A549 cells (human, lung; CRM-CCL-185, ATCC, RRID:CVCL_0023; kindly provided by Georg Herrler),</p> <p>Vero (African green monkey kidney, female, kidney; CRL-1586, ATCC; RRID: CVCL_0574, kindly provided by Andrea Maisner)</p> <p>Huh-7 (human, male, liver; JCRB Cat# JCRB0403; RRID: CVCL_0336, kindly provided by Thomas Pietschmann)</p> <p>Calu-3 (human, male, lung; HTB-55, ATCC; RRID: CVCL_0609, kindly provided by Stephan Ludwig)</p> <p>Caco-2 cells (human, male, colon; HTB-37, ATCC, RRID: CVCL_0025; kindly provided by Georg Herrler)</p> <p>Vero-hACE2-TMPRSS2 (African green monkey kidney, female, kidney; BEI resources, NR-54970)</p> |
| Authentication                                                    | Cell lines were validated using STR-typing, amplification and sequencing of a cytochrome c oxidase gene fragment, microscopic examination, and/or growth characteristics. Furthermore, mycoplasma contamination was routinely tested.                                                                                                                                                                                                                                                                                                                                                                                                                                                                                                |
| Mycoplasma contamination                                          | All cell lines tested negative for mycoplasma contamination.                                                                                                                                                                                                                                                                                                                                                                                                                                                                                                                                                                                                                                                                         |
| Commonly misidentified lines (See <a href="#">ICLAC</a> register) | No commonly misidentified cell lines were used.                                                                                                                                                                                                                                                                                                                                                                                                                                                                                                                                                                                                                                                                                      |

## Animals and other research organisms

Policy information about [studies involving animals; ARRIVE guidelines](#) recommended for reporting animal research, and [Sex and Gender in Research](#)

|                    |                                                                                                                                   |
|--------------------|-----------------------------------------------------------------------------------------------------------------------------------|
| Laboratory animals | <p>BALB/c mice (<i>Mus musculus</i>), 6–8 weeks of age</p> <p>Ferrets (<i>Mustela putorius furo</i>), 2.1 to 3.2 years of age</p> |
| Wild animals       | No wild animals were used in this study.                                                                                          |
| Reporting on sex   | Female animals were used. Animal sex is not expected to impact study results.                                                     |

|                         |                                                                                                                                                                                                                                                                                                                                                                                                                                                            |
|-------------------------|------------------------------------------------------------------------------------------------------------------------------------------------------------------------------------------------------------------------------------------------------------------------------------------------------------------------------------------------------------------------------------------------------------------------------------------------------------|
| Field-collected samples | No field collected samples were used in this study.                                                                                                                                                                                                                                                                                                                                                                                                        |
| Ethics oversight        | All mouse studies were approved by the University of Iowa Animal Care and Use Committee and meet stipulations of the Guide for the Care and Use of Laboratory Animals.<br>The ferret infection study was evaluated by the responsible ethics committee of the State Office of Agriculture, Food Safety, and Fishery in Mecklenburg–Western Pomerania (LALLF M-V) and gained governmental approval under the registration number LVL MV TSD/7221.3-2-005/21 |

Note that full information on the approval of the study protocol must also be provided in the manuscript.

## Flow Cytometry

### Plots

Confirm that:

- The axis labels state the marker and fluorochrome used (e.g. CD4-FITC).
- The axis scales are clearly visible. Include numbers along axes only for bottom left plot of group (a 'group' is an analysis of identical markers).
- All plots are contour plots with outliers or pseudocolor plots.
- A numerical value for number of cells or percentage (with statistics) is provided.

### Methodology

|                           |                                                                                                                                                                                                                                                                                                                                                                                                                                                                                                                                                                                                                                                                                 |
|---------------------------|---------------------------------------------------------------------------------------------------------------------------------------------------------------------------------------------------------------------------------------------------------------------------------------------------------------------------------------------------------------------------------------------------------------------------------------------------------------------------------------------------------------------------------------------------------------------------------------------------------------------------------------------------------------------------------|
| Sample preparation        | The cells were rinsed in PBS containing 1% bovine serum albumin (BSA, PBS-B) and pelleted. The cell pellets were then resuspended in 250 $\mu$ l PBS-B containing different concentrations of soluble solACE2-Fc (Bio-Techne) and rotated for 60 minutes at 4 °C using a Rotospin test tube rotator disk (IKA). Cells were pelleted, resuspended in 250 $\mu$ l PBS-B containing anti-human AlexaFluor-488-conjugated antibody (1:200; Thermo Fisher Scientific), and rotated for 60 minutes at 4 °C. Finally, the cells were washed in PBS-B, fixed for 30 minutes at room temperature in a 1 % paraformaldehyde solution, washed again, and resuspended in 100 $\mu$ l PBS-B. |
| Instrument                | ID7000 Spectral Cell Analyzer (Sony Biotechnology, San Jose, CA, USA)                                                                                                                                                                                                                                                                                                                                                                                                                                                                                                                                                                                                           |
| Software                  | ID7000 software                                                                                                                                                                                                                                                                                                                                                                                                                                                                                                                                                                                                                                                                 |
| Cell population abundance | Does not apply since a cell line was analyzed.                                                                                                                                                                                                                                                                                                                                                                                                                                                                                                                                                                                                                                  |
| Gating strategy           | We gated for single cells and then analyzed fluorescence of this cell population, as shown in Suppl. Fig. 1.                                                                                                                                                                                                                                                                                                                                                                                                                                                                                                                                                                    |

Tick this box to confirm that a figure exemplifying the gating strategy is provided in the Supplementary Information.
